# Supplementary material
Source: publisher figshare collection journal article supplement (https://diabetesjournals.figshare.com/ndownloader/files/22051767)
Supplement: Supplementary file 1 [file 22051767]

SUPPLEMENTARY DOCUMENT

CONTENTS

Search terms for DPP-4inhibitors……………………………………………………………………………………………. 1

Search terms for SGLT-2inhibitors……………………………………………………………………………………………1

Search terms for GLP 1RA…………………………………………………………………………………………………………1

Fig S1a Selection of DPP-4 inhibitor studies included in meta-analysis(PRISMA chart)………………………….2

Fig S1bRisk of Bias of DPP-4 inhibitor studies included in meta-analysis……………………………………………..3

FigS1cFunnel plot of change in HbA1c in the studies used in the meta-analysis for DPP-4 inhibitors…..3

Fig S1dEgger’s test of change in HbA1c in the studies used in the meta-analysis for DPP-4 inhibitors…..4

Fig S1eForest plot for White and Asian dominant groups for DPP-4 inhibitors for 12 weeks…………………4

Fig S2a Selection of SGLT-2 inhibitor studies included in meta-analysis(PRISMA chart)………………………….5

Fig S2b Risk of Bias of SGLT-2 inhibitor studies included in meta-analysis……………………………………………..6

Fig S2c Funnel plot of change in HbA1c in the studies used in the meta-analysis for SGLT-2inhibitors…..6

Fig S2d Egger’s test of change in HbA1c in the studies used in the meta-analysis for SGLT-2inhibitors…..7

Fig S2e Forest plot for White and Asian dominant groups for SGLT-2inhibitors for 12 weeks…………………7

Fig S3a Selection of GLP-1RA studies included in meta-analysis(PRISMA chart)…………………………………….8

Fig S3b Risk of Bias of GLP-1RA inhibitor studies included in meta-analysis………………………………………….9

Fig S3c Funnel plot of change in HbA1c in the studies used in the meta-analysis for GLP-1RA ……………..9

Fig S3d Egger’s test of change in HbA1c in the studies used in the meta-analysis for GLP-1RA ……………..10

Fig S3e Forest plot for White and Asian dominant groups for GLP-1RA for 12 weeks………………..…………10

Fig S4 Univariate meta-regression analysis for HbA1c (DPP-4 inhibitors)…………………………………………….11

Fig S5 Univariate meta-regression analysis for HbA1c (SGLT-2 inhibitors)……………………………………………12

Fig S6 Univariate meta-regression analysis for HbA1c (GLP 1RA)………………………………………………………….13

Table S1a : Risk of bias assessment for DPP-4 inhibitors for the included studies………………14

Table S1b : Risk of bias assessment for SGLT-2 inhibitors for the included studies…………….14

Table S1c : Risk of bias assessment for GLP-1RA for the included studies………………………….14

Table S2a : Results of sub-group analysis for DPP-4 inhibitors, SGLT-2 inhibitors and GLP-1RA for 24 weeks………………………………………………………………………………………………………………………15

Table S2b : Results of sub-group analysis for DPP-4 inhibitors, SGLT-2 inhibitors and GLP-1RA for 12 weeks………………………………………………………………………………………………………………………16

Table S3: Univariate meta-regression analysis. ………………………………………………………………….17

Table S4: Percentage of Asian or White studies in multiple therapy…………………………………..19

SEARCH TERMS FOR DPP-4inhibitors

**"Diabetes Mellitus, Type 2/drug therapy*"[MeSH ] OR "Diabetes Mellitus, Type 2/ethnology*"[MeSH ] OR "Diabetes Mellitus, Type 2/blood* "[MeSH ] OR "Diabetes Mellitus, Type 2/epidemiology"[MeSH ] OR "Metabolic Syndrome/epidemiology* "[MeSH ] OR "Metabolic Syndrome/therapy*"[MeSH ]**

**AND**

**“Dipeptidyl-Peptidase IV Inhibitors/administration & dosage*”[MeSH] OR “Dipeptidyl-Peptidase IV Inhibitors/therapeutic use*” [MeSH] OR Sitagliptin OR Linagliptin OR Alogliptin OR Vildagliptin OR Saxagliptin**

**NOT**

**“Dipeptidyl-Peptidase IV Inhibitors /adverse effects”[MeSH] OR Retinopathy OR Nephropathy OR Cardiovascular OR renal**

Filters: **Clinical Trial; Humans; Age 19+; English**

SEARCH TERMS FOR SGLT-2inhibitors

**"Diabetes Mellitus, Type 2/drug therapy*"[MeSH ] OR "Diabetes Mellitus, Type 2/ethnology*"[MeSH ] OR "Diabetes Mellitus, Type 2/blood* "[MeSH ] OR "Diabetes Mellitus, Type 2/epidemiology"[MeSH ] OR "Metabolic Syndrome/epidemiology* "[MeSH ] OR "Metabolic Syndrome/therapy*"[MeSH ]**

**AND**

**“Sodium-Glucose Transporter 2/antagonists & inhibitors*”[MeSH] OR Empagliflozin OR Dapagliflozin OR Luseogliflozin OR Canagliflozin OR Ipragliflozin OR Tofogliflozin**

**NOT**

**“Sodium-Glucose Transporter 2/antagonists & inhibitors* /adverse effects”[MeSH] OR Retinopathy OR Nephropathy OR Cardiovascular OR Renal**

 Filters: **Clinical Trial; Humans; English, Age : 19 +**

SEARCH TERMS FOR GLP 1RA

**“Diabetes Mellitus, Type 2/drug therapy*"[MeSH ] OR "Diabetes Mellitus, Type 2/ethnology*"[MeSH ] OR "Diabetes Mellitus, Type 2/blood* "[MeSH ] OR "Diabetes Mellitus, Type 2/epidemiology"[MeSH ] OR "Metabolic Syndrome/epidemiology* "[MeSH ] OR "Metabolic Syndrome/therapy*"[MeSH ]**

**AND**

**“glucagon-like peptide-1 receptor agonists"[MeSH] OR Exenatide OR Liraglutide OR Lixisenatide OR Dulaglutide OR Albiglutide**

**NOT**

**“ glucagon-like peptide-1 receptor agonists /adverse effects”[MeSH] OR Retinopathy OR Nephropathy OR Cardiovascular OR renal**

 Filters: **Clinical Trial; Humans; Age 19+, English**


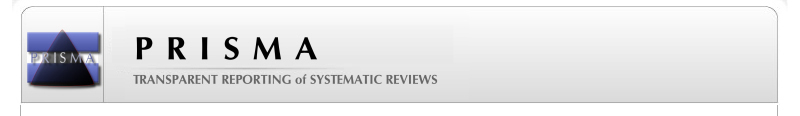
**DPP-4inhibitors**

Full-text articles assessed for eligibility
(n =148)

Studies included in quantitative synthesis (meta-analysis)
(n =26)

## Identification

## Eligibility

## Included

## Screening

Records identified through other sources(ref from studies)
(n = 12)

Records identified through database searching
(n = 1411)

Records after putting filters Clinical Trial, Age 19+, Humans and removing duplicates
(n = 401)

Records excluded
(n = 253)

Records screened
(n = 401)

Full-text articles excluded, with reasons (n =122)

<70% Asian or White : 48

Study duration <24

weeks : 34

Study duration >52

weeks : 1

less than 50 in each

arm : 18

No placebo comparison : 5

No efficacy measure : 13

Retracted : 1

No ethnicity info : 2

*Figure S1a : Selection of DPP-4 inhibitor studies included in meta-analysis.*

*
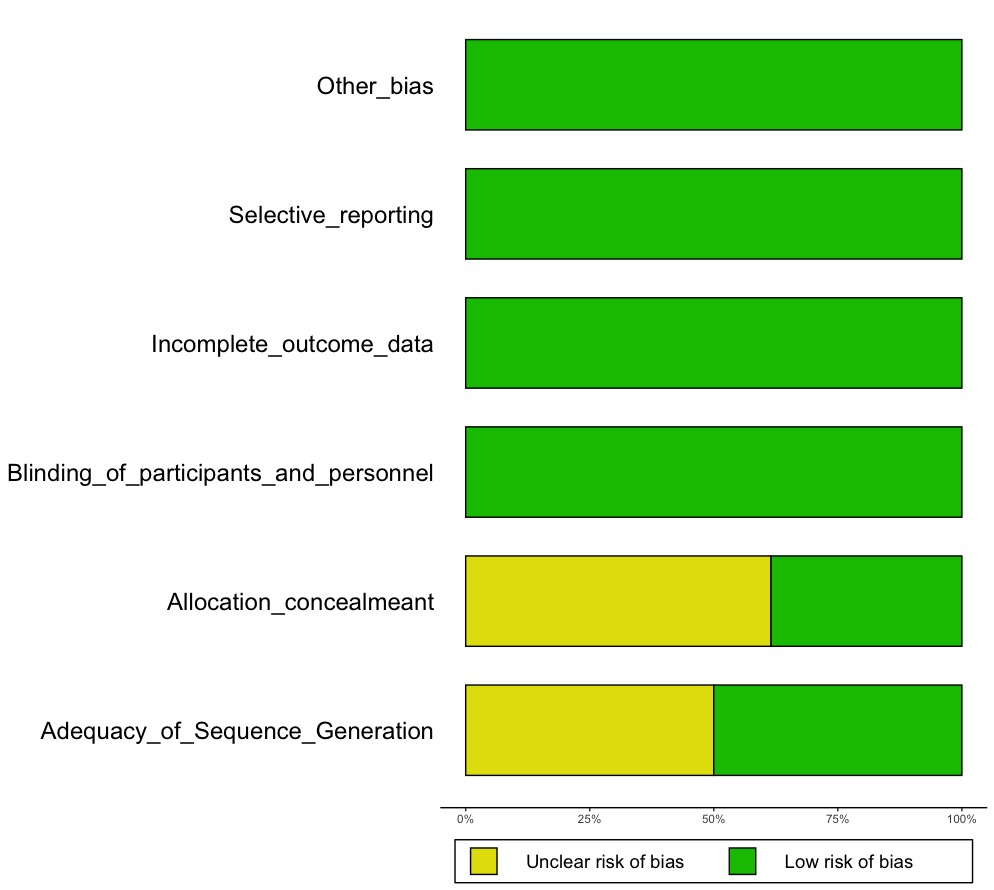
*

*Figure S1b : Risk of Bias of DPP-4 inhibitor studies included in meta-analysis.*

*p=0.6554*

*Fig S1c : Funnel plot of change in HbA1c in the studies used in the meta-analysis for DPP-4 inhibitors*

*Fig S1d : Egger’s test of change in HbA1c in the studies used in the meta-analysis for DPP-4 inhibitors*

*Fig S1e : Forest plot for White and Asian dominant groups for DPP-4 inhibitors for 12 weeks*


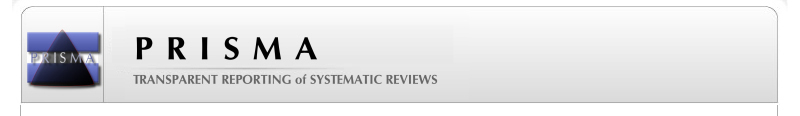
**SGLT-2inhibitors**

## Identification

## Eligibility

## Included

## Screening

Records identified through database searching
(n = 555)

Records after putting filters Clinical Trial, Age 19+, Humans and removing duplicates
(n = 171)

Records excluded
(n = 85)

Records screened
(n = 171)

Full-text articles excluded, with reasons (n =70)

<70% Asian or White : 16

Study duration <24

weeks : 5

Study duration >52

weeks : 1

less than 50 in each

arm : 7

No placebo comparison : 28

No ethnicity info : 7

No efficacy measure : 6

Full-text articles assessed for eligibility
(n =86)

Studies included in quantitative synthesis (meta-analysis)
(n =16)

*Figure S2a : Risk of Bias of SGLT-2 inhibitor studies included in meta-analysis.*

*
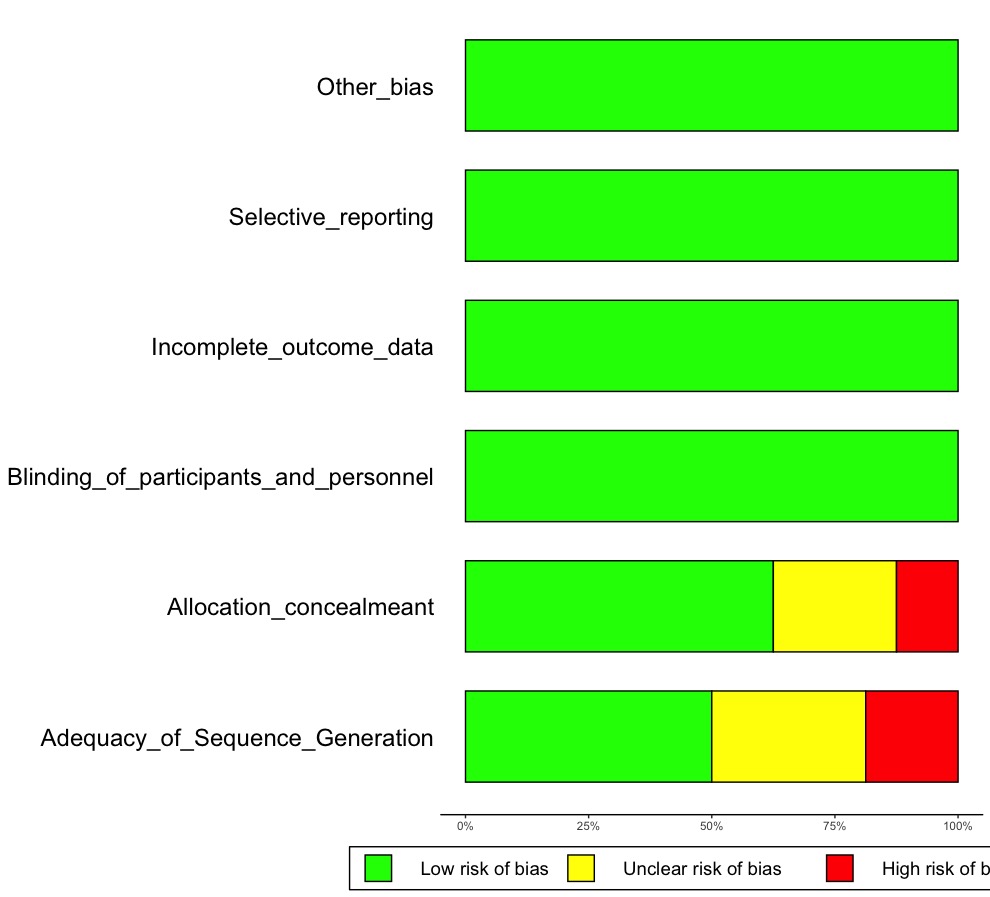
*

*Figure S2b : Risk of Bias of SGLT-2 inhibitor studies included in meta-analysis.*

*p=0.947*

*Fig S2c : Funnel plot of change in HbA1c in the studies used in the meta-analysis for SGLT-2 inhibitors*

*Fig S2d: Egger’s test of change in HbA1c in the studies used in the meta-analysis for SGLT-2 inhibitors*

*Fig S2e : Forest plot for White and Asian dominant groups for SGLT-2 inhibitors for 12 weeks*


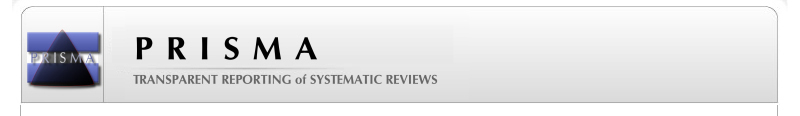
**GLP-1RA**

## Identification

## Eligibility

## Included

## Screening

Records identified through other sources(ref from studies)
(n = 4)

Records identified through database searching
(n = 1481)

Records after putting filters Clinical Trial, Age 19+, Humans and removing duplicates
(n = 374)

Records excluded
(n = 257)

Records screened
(n = 374)

Full-text articles excluded, with reasons (n =95)

<70% Asian or White : 8

Study duration <24

weeks : 8

Study duration >52

weeks : 1

less than 50 in each

arm : 9

No placebo comparison : 54

Drug Switch : 2

Insulin background : 1

No efficacy measure : 12

Full-text articles assessed for eligibility
(n =117)

Studies included in quantitative synthesis (meta-analysis)
(n =22)

*Figure S3a : Selection of GLP-1RA studies included in meta-analysis.*

*
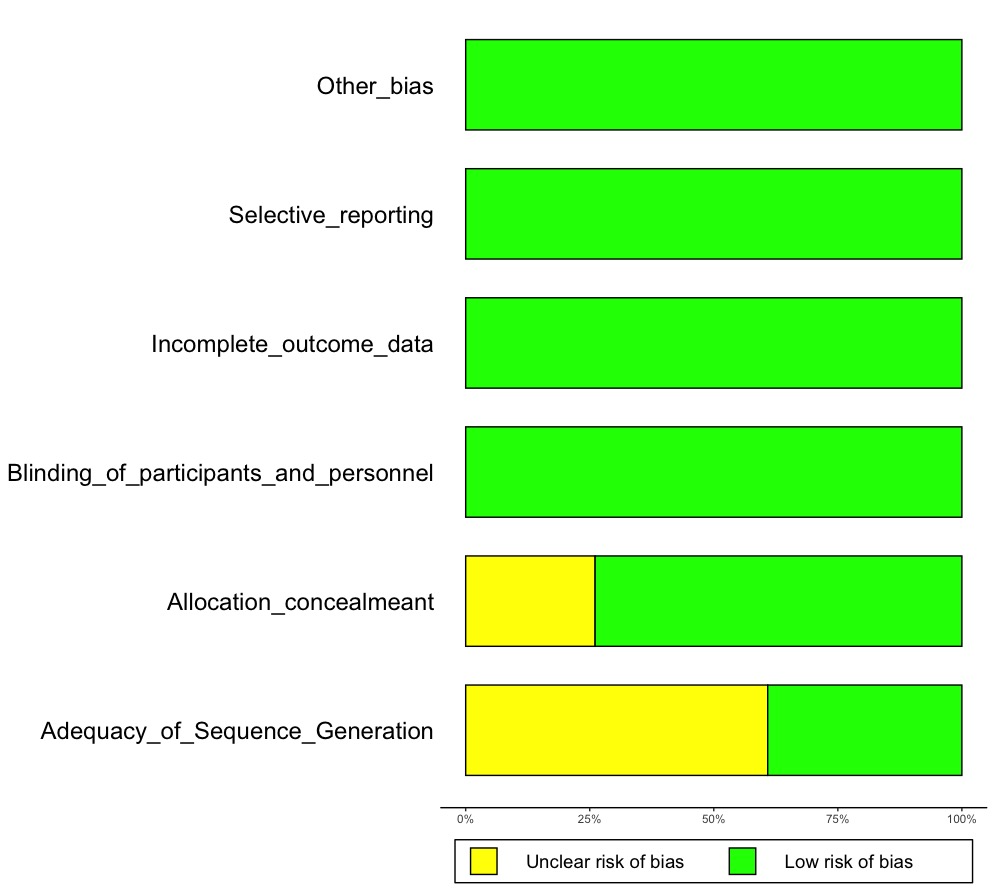
*

*Figure S3b : Risk of Bias of GLP-1RA studies included in meta-analysis.*

*p=0.332*

*Fig S3c : Funnel plot of change in HbA1c in the studies used in the meta-analysis for GLP-1R*

*Fig S3d : Egger’s test of change in HbA1c in the studies used in the meta-analysis for GLP-1RA*

*Fig S3e : Forest plot for White and Asian dominant groups for GLP 1RA for 12 weeks*

Fig S4 : Univariate meta-regression analysis for HbA1c (DPP-4 inhibitors)

White

Asian

*p=0.98*
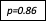


*p=0.33*
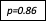


*a : Age b : Baseline HbA1c*

*p=0.22*
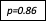


*p=0.38*
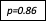


*c : BMI baseline d : Duration of diabetes*

*p=0.12*
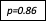


*p=0.60*
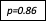


*e : Percentage of Men. f : Percentage of White*

Fig S5 : Univariate meta-regression analysis for HbA1c (SGLT-2 inhibitors)

White

Asian

*p=0.38*
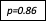


*p=0.80*
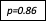


*a : Age. b : Baseline HbA1c*

*P<0.01**
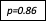


*p=0.85*
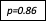


*c : BMI baseline d : Duration of diabetes*

*P<0.01**
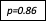


*p=0.09*
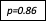


*e : Percentage of Men. f : Percentage of White*

Fig S6: Univariate meta-regression analysis for HbA1c (GLP-1RA)

White

Asian

*p=0.99*

*p=0.98*

*a : Age. b : Baseline HbA1c*

*p=0.54*

*p=0.94*

*c : BMI baseline d : Duration of diabetes*

*p=0.59*
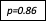


*p=0.99*
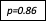


*e : Percentage of Men. f : Percentage of White*

*Table S1a : Risk of bias assessment for DPP-4 inhibitors for the included studies*

*Table S1b : Risk of bias assessment for SGLT-2 inhibitors for the included studies*

*Table S1c : Risk of bias assessment for GLP-1RA for the included studies*

| ***DPP-4 inhibitors*** |  |  |
| --- | --- | --- |
| ***Ethnicity*** | ***Number of studies*** | ***Mean difference (95% CI)*** |
| *Asian* | *9* | *-0.62[-0.80,-0.45]* |
| *White* | *17* | *-0.49[-0.59,-0.38]* |
| ***Test for sub-group differences (p value)*** |  | *0.1919* |
|  |  |  |
| ***SGLT-2 inhibitors*** |  |  |
| ***Ethnicity*** | ***Number of studies*** | ***Mean difference (95% CI)*** |
| *Asian* | *7* | *-0.96[-1.10,-0.82]* |
| *White* | *9* | *-0.64[-0.74,-0.53]* |
| ***Test for sub-group differences (p value)*** |  | *0.0003* |
|  |  |  |
| ***GLP-1RA*** |  |  |
| ***Ethnicity*** | ***Number of studies*** | ***Mean difference (95% CI)*** |
| *Asian* | *3* | *-0.76[-1.19,-0.33]* |
| *White* | *20* | *-0.79[-0.89,-0.69]* |
| ***Test for sub-group differences (p value)*** |  | *0.8957* |

*Table S2a : Results of sub-group analysis for DPP-4 inhibitors, SGLT-2 inhibitors and GLP-1RA for 24 weeks*

| ***DPP-4 inhibitors*** |  |  |
| --- | --- | --- |
| ***Ethnicity*** | ***Number of studies*** | ***Mean difference (95% CI)*** |
| *Asian* | *14* | *-0.73[-0.88,-0.57]* |
| *White* | *19* | *-0.49[-0.59,-0.39]* |
| ***Test for sub-group differences (p value)*** |  | *0.0098* |
|  |  |  |
| ***SGLT-2 inhibitors*** |  |  |
| ***Ethnicity*** | ***Number of studies*** | ***Mean difference (95% CI)*** |
| *Asian* | *9* | *-0.85[-1.03,-0.66]* |
| *White* | *12* | *-0.57[-0.69,-0.44]* |
| ***Test for sub-group differences (p value)*** |  | *0.0182* |
|  |  |  |
| ***GLP-1RA*** |  |  |
| ***Ethnicity*** | ***Number of studies*** | ***Mean difference (95% CI)*** |
| *Asian* | *5* | *-0.79[-1.03,-0.54]* |
| *White* | *22* | *-0.79[-0.89,-0.70]* |
| ***Test for sub-group differences (p value)*** |  | *0.9657* |

*Table S2b : Results of sub-group analysis for DPP-4 inhibitors, SGLT-2 inhibitors and GLP-1RA for 12 weeks*

| ***DPP-4 inhibitor*** |  |  |  |  |
| --- | --- | --- | --- | --- |
| ***Variable*** | ***Estimate*** | ***SE*** | ***CI*** | ***p value*** |
| *Intercept* | *-0.15* | *0.40* | *[-0.93,0.64]* | *0.72* |
| *Age* | *-0.01* | *0.01* | *[-0.02,0.01]* | *0.33* |
|  |  |  |  |  |
| *Intercept* | *-0.63* | *0.08* | *[-0.78,-0.47]* | *<0.01* |
| *Percentage of white* | *0* | *0* | *[-0.00,0.00]* | *0.12* |
|  |  |  |  |  |
| *Intercept* | *-0.37* | *0.14* | *[-0.64,-0.10]* | *<0.01* |
| *Duration of diabetes* | *-0.03* | *0.02* | *[-0.07,0.02]* | *0.22* |
|  |  |  |  |  |
| *Intercept* | *-0.38* | *0.29* | *[-0.94,0.18]* | *0.19* |
| *Percentage of men* | *0* | *0.01* | *[-0.01,0.01]* | *0.60* |
|  |  |  |  |  |
| *Intercept* | *-0.97* | *0.5* | *[-1.95,-0.02]* | *0.05* |
| *BMI baseline* | *0.01* | *0.02* | *[-0.02,0.05]* | *0.38* |
|  |  |  |  |  |
| *Intercept* | *-0.56* | *1.01* | *[-2.55,1.42]* | *0.58* |
| *HbA1c baseline* | *0* | *0.12* | *[-0.24,0.24]* | *0.98* |
|  |  |  |  |  |
| ***SGLT-2 inhibitor*** |  |  |  |  |
| ***Variable*** | ***Estimate*** | ***SE*** | ***CI*** | ***p value*** |
| *Intercept* | *0.34* | *1.27* | *[-2.15,2.83]* | *0.79* |
| *Age* | *-0.02* | *0.02* | *[-0.06,0.02]* | *0.38* |
|  |  |  |  |  |
| *Intercept* | *-0.94* | *0.07* | *[-1.08,-0.81]* | *<0.01* |
| *Percentage of white* | *0* | *0* | *[0.00,0.01]* | *<0.01* |
|  |  |  |  |  |
| *Intercept* | *-0.74* | *0.26* | *[-1.25,-0.23]* | *<0.01* |
| *Duration of diabetes* | *-0.01* | *0.03* | *[-0.07,0.06]* | *0.85* |
|  |  |  |  |  |
| *Intercept* | *-0.29* | *0.30* | *[-0.88,0.29]* | *0.33* |
| *Percentage of men* | *-0.01* | *0.01* | *[-0.02,0]* | *0.10* |
|  |  |  |  |  |
| *Intercept* | *-1.91* | *0.41* | *[-2.72,-1.09]* | *<0.01* |
| *BMI baseline* | *0.04* | *0.01* | *[0.01,0.07]* | *0.01* |
|  |  |  |  |  |
| *Intercept* | *-1.19* | *1.61* | *[-4.34,1.96]* | *0.46* |
| *HbA1c baseline* | *0.05* | *0.20* | *[-0.33,0.43]* | *0.80* |
|  |  |  |  |  |
| ***GLP-1RA inhibitor*** |  |  |  |  |
| ***Variable*** | ***Estimate*** | ***SE*** | ***CI*** | ***p value*** |
| *Intercept* | *-0.80* | *0.67* | *[-2.12,0.52]* | *0.23* |
| *Age* | *0* | *0.01* | *[-0.02,0.02]* | *0.98* |
|  |  |  |  |  |
| *Intercept* | *-0.78* | *0.14* | *[-1.05,-0.51]* | *<0.01* |
| *Percentage of white* | *0* | *0* | *[0,0]* | *0.99* |
|  |  |  |  |  |
| *Intercept* | *-0.68* | *0.40* | *[-1.78,-0.22]* | *<0.01* |
| *Duration of diabetes* | *-0.01* | *0.01* | *[-0.01,0.02]* | *0.59* |
|  |  |  |  |  |
| *Intercept* | *-1.00* | *0.38* | *[-1.81,-0.32]* | *<0.01* |
| *Percentage of men* | *0.01* | *0.01* | *[-0.01,0.02]* | *0.43* |
|  |  |  |  |  |
| *Intercept* | *-0.83* | *0.60* | *[-2.00,0.34]* | *0.17* |
| *BMI baseline* | *0* | *0.02* | *[-0.04,0.04]* | *0.94* |
|  |  |  |  |  |
| *Intercept* | *-0.80* | *1.16* | *[-3.08,1.48]* | *0.49* |
| *HbA1c baseline* | *0* | *0.14* | *[-0.28,0.28]* | *0.99* |

*Table S3: Univariate meta-regression analysis.*

| *Drug* | *Ethnicity* | *Monotherapy* | *Dual therapy* | *Triple therapy* | *Total* |
| --- | --- | --- | --- | --- | --- |
| *DPP-4i* | *Asian* | *3* | *4* | *1* | *8* |
|  | *Percent(%)* | *37.5* | *50* | *12.5* |  |
|  | *White* | *6* | *10* | *2* | *18* |
|  | *Percent(%)* | *33.3* | *55.5* | *11.1* |  |
| *SGLT 2i* | *Asian* | *5* | *2* | *0* | *7* |
|  | *Percent(%)* | *71.4* | *28.6* | *-* |  |
|  | *White* | *6* | *1* | *2* | *9* |
|  | *Percent(%)* | *66.6* | *11.1* | *22.2* |  |
| *GLP 1RA* | *Asian* | *3* | *-* | *-* | *3* |
|  | *Percent(%)* | *100* | *-* | *-* |  |
|  | *White* | *17* | *3* | *-* | *20* |
|  | *Percent(%)* | *85* | *15* | *-* |  |

*Table S4: Percentage of Asian or White studies in multiple therapy*
